# Supplementary material for: Time Is of the Essence—Early Activation of the Mevalonate Pathway in Apple Challenged With Gray Mold Correlates With Reduced Susceptibility During Postharvest Storage
Source: Front Microbiol. 2022 May 12;13:797234. doi: 10.3389/fmicb.2022.797234 (PMC9133740; doi:10.3389/fmicb.2022.797234)
Supplement: Supplementary file 8 [file Table_8.XLSX]

## Sheet: Apple_GC_NORM
Sample	Apple01	Apple02	Apple03	Apple04	Apple05	Apple06	Apple07	Apple08	Apple09	Apple11	Apple12	Apple13	Apple14	Apple15
Treatment	Control	Mock	Bc-Inoculated	Control	Mock	Bc-Inoculated	Control	Mock	Bc-Inoculated	Mock	Bc-Inoculated	Control	Mock	Bc-Inoculated
Cpd001: L-Alanine	1236564,125	938545,9761	1596279,674	1406864,067	127294,2282	704780,444	772857,4283	985789,5236	525650,4522	1574551,338	997615,5729	1580254,209	487899,1615	562963,656
Cpd002: Unknown_168	1213823,936	1532800,332	1491235,116	1339681,612	1745615,507	1712600,726	2407999,531	1855046,904	2161210,72	1861929,251	1471575,337	1665979,569	1618430,517	1546587,526
Cpd003: 6-Azacytosine	192556,6903	568843,7588	642624,6893	368878,3137	117608,8102	203206,7696	198008,4764	465722,0307	209661,6856	603846,8187	860683,9983	461642,4286	461470,5462	487721,8917
Cpd004: 1,2-Ethenediol	66107,34808	99758,17687	126464,7736	69046,10095	72920,82014	89604,7306	89576,39234	84031,20605	94382,81159	90030,7639	83059,38392	72857,4664	75003,82753	57069,45055
Cpd005: 3-Hydroxypropionic acid	76530,43976	49352,74197	134989,4992	60922,39303	55112,36454	59413,64164	142198,8027	57446,52818	152617,1883	77575,35541	128028,7439	45864,7604	42183,68176	73321,28667
Cpd006: 2(1H)-Pyridinone, 3-acetyl-4-hydroxy-6-methyl-	59553,95863	147256,7405	120223,851	98329,79526	78938,55794	144641,637	218083,7943	119098,7649	208023,8707	181742,9274	155013,8595	157733,2445	139216,5022	117233,0669
Cpd007: Unknown_167	311195,7721	829998,8476	742295,7522	507958,9007	123559,6629	250949,0306	267517,6873	517383,9111	206924,2238	653702,7271	979824,8108	1231044,243	514632,9229	506477,8538
Cpd008: Unknown_166	362883,5736	505796,4151	451495,9584	402682,9252	482799,0921	474189,7117	573523,9578	503027,6054	526584,1411	588459,1634	474635,5932	454988,7979	481585,3304	519497,4725
Cpd009: 3,4-Epoxy-2-pentanone	14620932,77	22669111,82	27624297,02	20505395,6	36573492,23	29317890,47	33081597,65	30327276,65	33700263	32895132,8	27122374,68	9450701,388	22865256,52	16272759,34
Cpd010: 4-Pyridinol	471785,5607	659039,4167	585677,187	520746,8372	650187,8079	626685,0826	761540,619	650035,5445	656387,7779	724121,664	615427,6294	581810,3725	620587,1716	593406,4495
Cpd011: Unknown_165	427902,401	578328,7142	576260,4184	471355,5463	641839,5368	651959,1964	761321,7626	600394,8774	657250,1539	518038,6626	473799,9395	305543,6451	508487,1138	502188,3792
Cpd012: Unknown_164	76290,36607	57900,37352	20818,29052	69943,02532	99442,47016	79796,68139	65718,63721	99339,66938	51042,54446	104209,8406	72136,94394	52598,35671	97864,88555	78206,57523
Cpd013: Dimethyloctylmethoxysilane	1442439,684	3494877,009	12517108,63	5174846,05	6728813,387	3788169,143	1940299,856	8071291,616	4497093,383	927659,8528	1951538,412	7149257,002	13783789,25	6260661,939
Cpd014: Unknown_163	419020,9181	1015220,835	452686,3989	368550,7171	340029,0804	411991,9299	534351,1505	481614,0773	397551,527	468919,9176	468888,8737	302711,1455	449016,5789	473384,508
Cpd015: Monomethylphosphate	68926,2749	112169,5776	115682,8235	142984,9587	105565,871	135000,4827	92201,68451	133087,1591	136195,518	163543,7884	130729,1453	191083,7596	127888,301	131507,2338
Cpd016: Unknown_162	243748,1656	145762,1217	140378,714	235135,2127	274272,4074	268368,1055	215769,5165	231738,0693	229389,6972	294737,7586	199816,0866	149113,0361	212298,9491	165056,2507
Cpd017: Unknown_161	7834175,053	10906575,98	6001909,084	6065664,559	9324858,507	8783497,876	9834721,407	10789339,38	6211446,22	11432132,72	9742931,003	6408616,941	11244602,03	8900933,697
Cpd018: Dimethyloctylmethoxysilane	423402,3466	904717,2183	2872272,652	1636650,154	1669583,413	712949,9575	668058,4693	1826793,541	1015308,374	281621,7061	692020,7362	2638246,357	4462956,002	1335322,921
Cpd019: Pentasiloxane, dodecamethyl-	582595,093	636127,8206	445381,7723	399044,8199	491713,1067	466471,1791	735479,974	533253,4405	617403,6907	494796,3441	401135,273	487649,3258	467682,3364	474731,8654
Cpd020: Unknown_160	317752,2834	378352,404	247801,899	210525,1876	354106,0448	304411,0294	326166,9483	293009,2912	272866,7059	235330,1552	196136,38	143057,719	233095,6659	291963,8817
Cpd021: 1-Aminocyclopropanecarboxylic acid	36566,9661	26254,26379	31285,10432	22096,34184	9013,04517	26663,75843	14463,77072	12243,87755	15845,11116	57451,82381	67449,75704	42922,40449	11808,80183	30266,21513
Cpd022: L-Valine	5020378,832	1844733,035	791508,5665	2661036,089	955024,0784	2069781,406	3158994,092	3070034,339	801867,6287	3052918,81	1549792,022	3902733,413	1857829,888	2892702,762
Cpd023: Unknown_159	78110,9106	81026,59117	63936,68296	63920,5349	68456,54835	65221,39901	81974,21811	73723,92143	71224,69429	78606,14449	70519,24661	54039,6066	64387,23167	71719,25586
Cpd024: Unknown_158	15677,1985	20103,84423	19378,59588	15756,67448	6798,577123	15214,56842	16759,66882	20045,64957	12697,24449	15681,97607	15135,40987	13929,81611	17357,4287	14699,37511
Cpd025: Unknown_157	90678,43815	137124,6698	133815,8408	106413,2432	118913,945	128995,4571	127716,8308	112785,808	131338,5501	147658,0529	105950,0192	103899,8154	89869,19531	82978,82425
Cpd026: Unknown_156	59901,7164	96059,38744	85842,16734	81227,63504	69121,54455	99037,15571	158048,2885	101328,8529	157096,0659	175751,0672	147729,3809	94718,57879	123272,2836	138314,8509
Cpd027: Unknown_155	389061,9761	441978,1518	365902,5178	300371,727	325867,7854	267825,633	317218,9722	293725,2726	240631,611	271718,6829	260355,6421	154157,3023	232431,778	229117,8167
Cpd028: 2-Hydroxypropenoic acid	193320,1247	293316,7636	272625,0903	225016,3035	262728,5707	266556,2778	297063,9925	264378,1304	286126,7155	315075,2235	269185,2596	225491,3974	224463,0141	196001,0036
Cpd029: 4-Hydroxybutanoic acid	5908839	8425281,547	7411078,603	7248911,709	8567106,395	8297669,205	10463448,45	9075186,726	8596576,288	10902239,01	8275812,611	7949215,566	9320821,619	9484072,605
Cpd030: Unknown_154	69460,0449	96647,89255	73772,30274	74887,60776	91393,17501	84276,08181	104616,3035	97654,70238	82501,57791	107632,5961	85828,20978	67967,39306	92897,46447	92396,36893
Cpd031: Unknown_153	287567,5755	370525,8402	436670,9175	268947,5586	423879,939	369170,8616	380537,8042	391548,1922	366858,6609	333261,9639	300107,8617	188281,8014	330360,065	432847,5549
Cpd032: Urea	188597,8101	382432,9858	215724,7356	286295,868	202658,8538	376534,7996	322471,1481	578115,1491	659714,6509	873965,0853	962481,2285	488376,0581	1341320,492	1652222,036
Cpd033: Unknown_152	222255,0022	300413,6034	393876,3309	255617,396	258278,1091	288963,6969	350590,1477	333596,6195	362359,0726	400267,4861	386970,9785	253238,6773	328994,5605	322990,4292
Cpd034: Unknown_151	35697,90606	64940,08246	77357,7215	61469,83386	72446,93271	74042,21849	99880,63172	115311,8879	119112,1106	126001,5386	100921,1918	125618,4636	115132,6908	70281,95605
Cpd035: 3-Pyridylcarbinol	251372,8693	180059,0526	263082,9797	344999,387	273931,6642	377783,983	250029,7602	270543,2908	197021,2882	501026,2013	237883,2735	240908,1687	164197,3975	171289,0279
Cpd036: Unknown_150	362837,9785	514057,6795	397691,0696	372317,599	377874,1048	399343,7419	405167,021	366449,0598	377474,4103	451523,0234	357480,7536	302022,7973	318783,1464	326743,2414
Cpd037: 4-Hydroxy-3-penten-2-one	18732369,51	19901353,44	7049082,05	13592075,37	11500622,51	10328597,8	10998970,06	14456369,95	5915123,977	21130179,04	19026374,21	13524174,62	22519634,41	28025554,2
Cpd038: L-Serine	1026765,691	1226604,315	1485468,955	1754451,887	274464,3229	1095040,046	2379914,055	1724201,488	806173,8199	2693476,91	1044600,639	2986904,598	987309,2205	322702,5786
Cpd039: Unknown_149	228469,7863	244494,2736	198083,9955	165866,4342	266279,5059	216990,429	221437,3592	228051,2831	230663,497	246125,8712	185773,4465	83950,5926	199700,1172	228157,2959
Cpd040: Orthophosphate	36006499,08	45178626,13	46129029,01	35296796,12	43202931,35	39520502,45	47102962,56	46533249,35	46050123,95	51239933,35	44480860,88	38034454,76	43840641,55	46514987,59
Cpd041: Glycerol	406983,0572	302034,713	1523489,758	242470,9875	349068,5482	1701650,285	322601,2591	398367,2563	984346,3062	526904,9914	2488861,448	271659,6789	311469,8795	1262381,919
Cpd042: Unknown_148	44393,62545	60435,57047	29745,00321	41345,19459	39479,24254	41782,40967	44833,9289	49809,45677	26276,38312	54365,22925	46816,71092	45584,23237	58334,29213	64625,7384
Cpd043: 2-Aminocaprylic acid, N-ethoxycarbonyl-, isohexyl ester	51483,30314	58357,81821	65488,53075	51424,90131	66696,94019	61689,06462	52987,99496	62697,26041	56573,89679	83117,41779	49488,01755	37086,90136	60415,87284	63681,37441
Cpd044: Unknown_147	83686,04793	97789,2124	84389,01916	75796,02932	89670,27896	89166,54439	105408,2013	96002,87654	85130,22515	103543,274	83784,40023	69576,35682	92695,38976	99651,69259
Cpd045: Unknown_146	184948,9384	155069,4249	80791,24707	160020,7369	145421,1991	224929,7052	348862,9501	205566,9162	354237,2645	297769,0332	211960,1402	142836,4067	207582,965	210360,1533
Cpd046: Unknown_145	56904,04893	64281,26816	39454,83366	40357,21736	65798,02821	61257,84647	65564,33797	67152,72872	47228,15873	72770,15266	53722,87976	26157,18892	61679,59863	41483,75488
Cpd047: L-Isoleucine	14287157,42	970754,552	398637,2385	4247512,537	2083337,412	3852951,519	10571008,45	5746425,022	1884225,633	5393612,456	799564,1165	3871988,546	1626010,772	8535683,454
Cpd048: L-Threonine	131961,1709	142233,0665	328651,3928	242500,4384	89169,83823	269633,3099	697303,8839	323231,6666	246538,2661	374522,5948	178306,0475	281906,4503	137429,6569	47501,24911
Cpd049: 2-Butenedioic acid	49958397,71	65203399,35	77743388,04	49070506,02	62993476,94	59408529,52	71296301,63	69060838,6	66652519,67	69108815,1	66165749,64	46825082,55	66226242,49	70222296,5
Cpd050: Unknown_144	5531462,49	6091377,746	2811595,663	5048590,288	4941197,525	5752773,393	5873401,452	4693569,552	4201999,874	6711842,936	4365021,959	5155490,027	4736647,196	5881089,317
Cpd051: Unknown_143	111945,6865	142082,4036	72452,34754	96561,36133	108252,9816	108972,7421	146633,4129	110367,5251	109453,8214	150153,8926	112779,2448	85752,59521	115384,8654	135553,7588
Cpd052: Unknown_142	371154,8966	851956,3668	245752,1891	346719,1501	97670,89797	161465,0279	161622,7782	336405,6405	77757,7487	308999,4102	413910,5134	287118,8798	254462,159	203871,9853
Cpd053: Butanedioic acid + ?	2764918,22	3484819,872	3305783,565	2717172,426	2803681,232	3002159,289	3193492,897	2987500,103	3015138,76	3953709,706	3532144,851	2500571,683	3019714,509	3358384,559
Cpd054: Unknown_141	188168,8962	229239,7269	147375,9497	164704,709	198264,8561	196737,6405	225181,8111	214197,0579	165876,859	235941,3502	194655,5919	134318,7616	224553,0166	214377,0583
Cpd055: Unknown_140	21706,99988	21059,7997	15149,62016	16949,36534	18398,10366	14581,58186	33164,05339	23318,6693	17133,55691	29261,24676	17465,80485	21099,68716	21566,69218	22637,90979
Cpd056: Unknown_139	41016,67381	48006,33432	32924,7264	36124,30156	40555,73325	38094,52634	45361,94392	43601,55075	34512,60502	47333,0022	39445,74525	32473,40971	44724,84279	46698,71788
Cpd057: Glyceric acid	221737,1887	219905,5427	224900,959	166873,4792	212261,8503	243358,0718	255383,0357	251701,6332	277571,3701	273563,5297	225857,2692	175401,3964	230579,7367	273370,5307
Cpd058: Unknown_138	29432,83827	40375,77723	29492,4556	29508,71551	35486,26641	36734,30698	37393,92979	36860,62816	33049,07261	45021,06122	35264,47379	26209,59633	33140,64671	36220,7878
Cpd059: Unknown_137	292536,1081	349568,833	252944,9315	259632,5144	296308,1284	296292,3557	380196,6655	342631,5546	292887,2649	374622,4818	311493,0436	243533,2054	305283,5346	369435,1686
Cpd060: Unknown_136	6798704,971	8373513,556	6329657,188	6617630,25	7809048,66	7439061,241	9039517,802	8818922,41	7403297,963	9260836,127	7768166,277	7148700,859	9267821,651	9084084,171
Cpd061: Uracil	11408,85532	16736,98455	29683,00409	12082,41799	11673,75253	17660,21232	20954,8145	19330,08554	18840,42726	19972,0887	49372,37094	30159,04397	24214,21137	32509,8881
Cpd062: Unknown_135	26161,95701	32644,65444	23317,0654	26832,59086	49027,67353	33200,13941	40032,67112	52172,37056	41684,58753	49709,93902	36968,05592	34136,80447	50023,85871	29669,22314
Cpd063: Unknown_134	1621263,016	1388609,79	692841,3682	950198,8237	122883,9084	620240,24	1169895,681	767633,7731	271159,7505	1017296,039	1438889,038	4022087,94	1208277,251	773937,9021
Cpd064: Unknown_133	230561,6934	257349,0236	231494,2952	202548,0294	197977,6197	236530,6041	263193,9293	254573,8786	205190,1673	311263,5382	264037,962	184070,9239	252769,8479	233384,2582
Cpd065: 2-Butenedioic acid	24189848,5	30295456,31	39069323,65	26376052,2	32387891,68	29834784,81	36965880,22	37089463,82	36346896,79	44046242,57	45712702,71	28940981,85	42829167,65	44973468,41
Cpd066: 4,6-Dihydroxypyrimidine	4760264,816	7017299,625	3186617,993	3621483,654	542933,9904	4273907,9	7402719,745	3614847,512	3613302,558	3755055,416	3470430,095	6462527,27	4306109,432	4361692,439
Cpd067: Serine	7605348,579	6485459,606	1080180,695	5630901,46	577398,7932	1373089,423	2915602,441	3790695,691	524667,8097	6054472,702	3434456,229	10104359,65	5489603,825	5386618,317
Cpd068: Unknown_132	502346,2479	627575,7966	511080,9179	480331,9563	617583,9595	578547,1546	662880,1557	628505,8641	555248,7191	662278,2838	553178,8135	357556,9893	593087,7944	676679,6368
Cpd069: Unknown_131	318694,0003	384993,7447	108377,2619	283871,8256	364934,4194	286822,5278	336908,9203	371742,5164	185044,4244	439846,113	329486,105	147048,1125	397434,2675	311950,9311
Cpd070: Unknown_130	1567349,606	1515647,363	647069,1729	1001805,563	1087740,967	1288134,873	1643726,827	1347936,323	1040888,513	2440083,894	1860852,807	963502,1894	1230606,885	1925555,99
Cpd071: 1,3,4-pentanetriol	414060,8643	309822,9128	297660,1919	331142,879	525199,5098	471683,7149	338501,0974	465411,9883	368171,2418	660893,8135	361039,2099	159455,0401	356417,978	336028,7549
Cpd072: Unknown_129	1070762,768	1529960,844	383722,3291	590806,6152	32792,15436	200778,5967	539504,4108	282581,3147	116906,2686	260481,9474	351213,3751	1438934,061	531695,8978	589140,9195
Cpd073: Unknown_128	35668,16415	43332,43824	34456,34455	33748,38209	42253,76394	39485,06453	52415,2747	47111,27036	41043,1836	58041,8555	53364,4883	35564,00154	51519,08723	56461,50512
Cpd074: Unknown_127	49335,78925	61659,82874	47391,53319	46576,59895	55599,7902	53414,06452	63497,14639	57780,28043	53284,17937	65451,14584	55812,83027	44183,05513	57546,68563	65862,54842
Cpd075: Unknown_126	22740,62183	30707,30362	18834,33022	23326,27954	27314,27073	27120,01896	27384,17687	33964,18705	24660,60867	41744,74524	33304,23805	22338,50796	39592,36333	41767,02885
Cpd076: Unknown_125	85612,71222	92617,04033	75077,83774	72491,71288	61377,09709	72053,8391	90185,32162	74844,32489	71910,86045	98499,9614	80988,636	86558,40746	77601,14765	77813,66747
Cpd077: L-Threonine	1391045,515	1068530,747	487440,6801	1043965,271	210701,6734	378419,4189	952055,8486	845318,0398	262679,3031	1077367,946	814034,9461	2141189,586	1070993,497	1193699,682
Cpd078: Unknown_124	49592,41523	66973,20643	55352,06817	50769,6254	65145,77967	64772,88722	79507,01084	69485,93933	68223,93052	76989,42086	62816,41508	54413,50414	68444,63873	67334,02506
Cpd079: Unknown_123	2895101,087	4265372,352	4298958,103	3522802,915	4596502,713	3391659,86	3398037,559	4498029,583	3472566,616	1107656,088	2207194,44	3602970,033	5203801,407	4106193,797
Cpd080: Ethanolamine	26107558,39	29443696,45	23077028,4	21967240,03	25858765,86	25484899,89	29753748,09	27034963,57	24798081,68	31010892,51	26273959,77	22034195,38	27128185,05	30433482,06
Cpd081: Unknown_122	2297230,554	2528518,385	2123272,19	1830406,145	2358568,664	2357669,097	2829775,108	2371135,572	2399333,489	2861519,061	2279016,661	1637203,537	2220701,243	2487201,873
Cpd082: 2,3-Dihydroxypropenoic acid	450952,8617	641002,9088	593184,0779	514094,7151	473459,4551	551537,671	523947,7729	566229,8505	502601,0226	772353,2713	613974,8217	601736,3464	579065,3669	537766,4008
Cpd083: Unknown_121	57903,18275	69719,78877	48930,47285	51949,2354	59355,83486	56664,74961	74367,06786	68256,30635	56892,20122	74853,3503	65293,75288	49966,96432	68545,22975	75286,88729
Cpd084: Unknown_120	85306,60102	91332,05509	67286,44948	71373,23673	79295,84715	75383,86082	92822,66782	86131,49186	72727,49624	106470,3112	89734,85279	68437,7501	88303,38022	101605,7095
Cpd085: Unknown_119	22700,84446	44603,8438	16224,01595	28295,44936	18473,79743	11375,66002	19235,86482	22402,4884	9256,383579	17256,14452	31428,05827	12184,38446	19687,02041	11396,48715
Cpd086: Hexadecane	32107,16751	45439,52082	6892,152504	33435,72749	20701,28996	32141,62379	38415,58574	7203,807375	7628,497292	39215,85872	42204,59895	38525,94205	42297,15797	46191,99087
Cpd087: Unknown_118	31428,18869	37133,50352	34396,70967	33660,28134	51761,47196	40368,65067	47022,37112	77414,29778	55720,92721	87222,00001	75324,99466	69225,10633	99774,99807	63418,45944
Cpd088: Unknown_117	0	19856,72369	48867,92924	69821,17496	56057,65017	46061,21138	63781,57068	75795,12823	92467,2233	94556,53647	67086,3696	64366,66533	66784,27971	57833,17849
Cpd089: Unknown_116	134484,0114	276239,3367	242611,2659	365903,0609	80286,22842	51777,82505	58154,43756	186740,6294	36131,37158	21262,90113	31488,8108	621732,7018	521361,1892	209868,9666
Cpd090: Unknown_115	23105,07014	30229,45805	31406,29884	31322,83291	26762,12318	34409,42396	26744,48541	34177,96879	27980,97596	42077,81173	29474,83888	39419,97939	41758,13136	35788,18526
Cpd091: Unknown_114	19033,80174	20864,96759	12541,55362	16593,83815	19928,82376	12641,92571	21499,24575	19558,13455	15873,33376	28635,38308	17785,56594	18809,09951	21388,4223	20576,58697
Cpd092: Unknown_113	21550,5673	14319,68636	22371,7273	11138,85031	21247,94747	19694,48281	39499,08686	36724,95155	37207,78594	22963,12397	25037,33082	13688,4201	15706,23572	23432,94267
Cpd093: Unknown_112	1090032,238	1338390,12	949586,4668	1005176,048	1156469,007	1109792,651	1396637,498	1279395,579	1038411,529	1440365,224	1194857,009	962934,8476	1279231,015	1389396,739
Cpd094: L-Aspartic acid	1283783,223	1885358,75	921191,6765	1960823,121	751424,0034	1226306,222	1867955,576	1994877,491	347956,789	3779288,228	1389529,636	3166317,541	2433600,464	799444,0483
Cpd095: ?-Alanine	4370683,125	5296641,576	4104845,344	4093915,28	4879448,181	4622946,191	5640602,439	5189818,872	4541643,633	5793557,982	4989632,834	3959876,838	5151242,252	5995263,436
Cpd096: Unknown_111	78876,49989	151666,684	119899,6602	128175,2812	164728,6859	103156,6133	201902,1806	202978,9663	117482,4856	162211,9474	125983,3592	86847,66882	167870,3798	138617,883
Cpd097: Tyramine	1348961,217	1621135,924	1051981,729	1226883,951	1286111,255	1214940,902	1550570,051	1503836,346	1150940,987	1714970,483	1434798,259	1206211,817	1621875,811	1790932,861
Cpd098: Unknown_110	39402,33824	101264,7174	161661,863	64307,21781	115520,0127	82042,85041	90086,90143	130509,6153	115635,4933	85485,64625	136589,8446	73387,90049	169737,94	128207,6957
Cpd099: Unknown_109	87423,21366	176857,0778	161755,232	162560,1062	164746,9113	166944,3185	180562,423	174349,2645	156846,064	200840,2746	175757,2442	153641,6458	158302,8858	162002,3682
Cpd100: Unknown_108	12949,37404	14569,83202	11783,5296	6801,73813	11034,02444	19460,54973	19042,7417	7372,522614	18521,64113	18237,08924	10002,66575	3882,259196	6866,343714	9714,100418
Cpd101: Unknown_107	228801,5577	350449,6634	308358,7981	112567,9639	53492,52959	135192,4755	176408,8037	169641,45	119748,5256	145645,1872	178302,1822	183215,7213	184365,5695	205141,7216
Cpd102: Unknown_106	105974,2141	129810,8322	92286,01877	104405,6984	116697,4622	98693,90945	119159,7866	118198,9899	96404,35941	132028,1618	107364,5717	86617,96714	122122,4647	132858,6042
Cpd103: 3-Aminoisobutyric acid	988816,2786	1253020,463	925201,2093	945213,1631	1065378,968	997293,2161	1289430,373	1142576,828	956907,6596	1272191,04	1088993,15	915717,182	1173867,739	1313050,826
Cpd104: Unknown_105	29182,65753	27940,3941	28728,56465	32737,64636	14454,24654	16510,77104	29811,15833	26401,14329	21524,29151	20056,67289	31627,73041	38963,25108	31206,3584	29953,68639
Cpd105: Unknown_104	155610,7847	194057,6506	88504,10982	138080,1037	0	181859,574	166259,5217	164104,9063	32921,13698	346261,4282	406451,6745	507355,1392	387359,8734	99524,45641
Cpd106: D-Citramalic acid	11011527,47	3835185,441	6334800,311	5080105,693	6949616,543	11372178,39	15977280,33	5394630,99	14500826,86	10945125,37	6905660,478	2833580,063	3313904,453	14340856,02
Cpd107: Unknown_103	41889,47419	83771,98466	61715,87592	32390,04092	20966,9632	38557,69701	73979,21096	53557,65954	50100,0259	43177,55389	58346,28014	36925,16714	63558,52944	64486,63869
Cpd108: Unknown_102	72221,58763	91598,2723	80019,6976	68895,55392	68122,30029	95980,25145	74749,33365	80145,35042	73272,71338	149062,5242	79146,16566	108471,0531	78266,85509	104286,1994
Cpd109: Malic acid	63341930,06	75057529,31	53892829,26	54725548,12	64375978,72	56094795,82	84520090,35	59800776,19	57117801,32	63132670,11	60476856,03	52047860,13	58907508,15	53329349,34
Cpd110: Unknown_101	808889,6285	1024043,994	782644,7416	776607,1519	907776,031	812414,3878	912751,9607	979934,4172	754726,622	1035049,875	838597,0652	730996,3565	917702,4629	1032512,991
Cpd111: Unknown_100	1839882,243	2532956,598	3441573,428	1976235,867	1938144,649	2360544,435	2162951,838	2673126,719	2789687,951	3085415,608	3161781,564	2056319,871	2786201,399	3228887,281
Cpd112: L-Threitol	1219041,723	1215701,424	1435816,942	998828,8063	1812816,654	1372438,045	1518081,315	1738716,853	1369235,979	1451798,786	1697877,458	940322,2183	1576040,212	1524268,794
Cpd113: Unknown_099	2609982,358	3581274,713	4559999,558	2882247,226	2463175,15	2727341,545	3075144,362	3465145,752	3415332,466	4844764,174	5037590,559	3101473,257	4044890,173	4384734,588
Cpd114: Erythritol	3241987,288	3181443,158	4291178,353	2516658,616	6830391,263	4352968,853	5316443,041	4976177,914	5515910,246	4236025,21	4985958,996	2156556,082	4407121,19	4432757,54
Cpd115: Unknown_098	23590770,35	32808524,47	23946704,41	24091702,37	2823842,277	18787005,59	30793773	23432515,37	15921725,21	30096892,75	30494462,81	37950640,76	30784659,11	30884776,13
Cpd116: Unknown_097	37479,57577	44322,39296	33157,99157	33552,93639	40330,34303	36723,62793	44030,27621	40728,06742	37106,42901	44554,56467	36407,79844	30754,6189	39958,50077	46269,87259
Cpd117: Unknown_096	5559,203736	8775,973984	7806,004709	6690,438307	6005,915106	7577,90978	10242,22519	10359,63581	8484,313278	9854,902979	10799,03527	11161,71273	9816,640649	7817,134636
Cpd118: Unknown_095	34266,17895	70354,1508	39978,85095	37730,94126	6703,84566	32753,62558	80488,03232	29048,68613	43407,46092	23791,45013	23740,38782	71648,77748	26633,59067	43361,56115
Cpd119: L-Aspartic acid	21704137,92	26533970,32	21335487,23	22314420,42	18877873,88	19206273,15	26640151,61	25158949,25	15853255,11	28725823,23	21703891,36	22077743,16	24683376,88	26152201,62
Cpd120: L-5-Oxoproline	24472857,07	21696576,29	17445379,88	18110055,75	14447741,26	17490947,13	21423141,35	22773315,24	15871709,81	25827065,16	17831450,64	16618634,26	20053647,28	22020324,07
Cpd121: Unknown_094	367845,7466	487503,7694	379503,3958	387393,8598	436257,2767	398810,2656	451198,557	429196,5992	365828,8278	502949,553	429906,4334	362926,3615	469461,9957	526902,0792
Cpd122: Unknown_093	89669,17946	211382,0477	141650,9884	94448,94292	32256,11472	61668,27689	57901,61542	89667,97273	45257,20857	70764,73544	100079,2739	156994,4344	68027,14981	62663,55722
Cpd123: Unknown_092	1792216,988	2461982,032	1786909,328	1965772,026	2154847,405	1966821,566	2123399,274	2177808,621	1710872,232	2510790,769	2089763,627	1744916,952	2293593,354	2534096,633
Cpd124: Unknown_091	5163304,259	6983390,14	14223418,8	7981640,577	9769994,518	8272016,239	10843949,97	11926530,23	12717894,63	14552990,17	17198301,65	9780902,794	15337244,11	15542675,07
Cpd125: 2,3,4-Trihydroxybutyric acid (isomer)	554187,6365	609342,3011	530332,8426	301479,4591	771605,355	598923,796	697900,1562	714811,6575	686414,0234	575124,5434	650774,2047	422617,8359	634314,8893	822177,3346
Cpd126: 2,6-Di-tert-butylphenoxytrimethylsilane	417796,4924	513511,0176	407245,4914	383605,835	478046,991	414579,9308	708443,1556	429175,939	576352,7198	487368,0033	408304,2398	379088,1795	482841,305	501397,8794
Cpd127: L-(-)-Fucose	176171,0379	176297,7056	175835,1414	121556,12	161199,1781	184733,4595	184802,165	205904,1062	153150,8466	209171,0542	199707,9601	168806,2495	208919,669	273541,6321
Cpd128: Unknown_090	74413,27835	88490,93795	86921,86985	105826,7489	37271,28661	43965,05468	80812,08812	81112,2506	39673,05042	91506,21083	107442,8368	111599,1142	95178,04449	79311,21195
Cpd129: Unknown_089	10351,20926	14057,61623	13548,73616	20758,85495	18572,27329	16262,79374	33840,34753	25995,71653	17076,41952	33268,1119	31718,14727	30851,12547	41976,07574	42697,15521
Cpd130: 2,3,4-Trihydroxybutyric acid	794078,5492	472276,7198	596359,4573	531615,6279	1131153,993	1265667,505	1065020,487	1197183,006	1173539,064	778993,5896	557567,0691	681155,6626	756246,0103	1160638,876
Cpd131: Unknown_088	14598,65343	15897,70734	12528,18833	16920,37447	18492,8645	15810,46127	22704,63806	19117,81553	16592,09273	22913,78678	17615,57144	17896,15307	22084,9575	26425,24956
Cpd132: Unknown_087	21296,86885	30301,65243	25685,94067	22180,26185	59766,26884	27772,51088	34613,43711	42230,95408	45250,94492	54552,19389	38503,57354	11541,91708	40461,07278	50380,16016
Cpd133: 2,4,7,9-Tetramethyl-5-decyne-4,7-diol (Surfinol 104)	149843,1949	269507,5169	216340,7387	96637,66725	179462,29	254915,2669	286287,3714	214129,9363	220483,6374	235234,214	209814,7311	80192,71251	253793,4629	301381,1856
Cpd134: Unknown_086	98557,72236	193191,6987	58414,31214	84448,35976	6648,053107	43220,80043	105249,1061	52273,36671	25830,45871	46170,92476	60363,9102	187162,5244	77997,7183	73284,10471
Cpd135: Unknown_085	20851,6813	15070,42561	14422,61479	10649,61228	14963,41171	16067,98646	18655,09513	15037,08552	18780,74265	18096,67533	14477,37925	11211,33539	14699,43608	15938,21643
Cpd136: Unknown_084	23634,36252	40027,13479	51380,37292	25542,44472	74252,63933	36925,17684	54345,69893	62392,58758	56525,28289	44072,61773	43384,92631	16247,76332	40453,45749	40130,27798
Cpd137: 2-Isopropylmalic acid	24351,59585	18997,31156	68942,59587	11387,97246	18847,09149	69830,80637	44717,43819	15396,27482	94312,6636	33801,23032	63556,55964	5292,240872	16588,95069	64466,20417
Cpd138: Unknown_083	34220,51882	36085,32717	26376,36316	23236,33525	29782,35394	26439,79482	28603,74668	35179,76276	25627,21481	34056,63612	36072,49022	15844,09291	46250,10046	30399,23578
Cpd139: Unknown_082	30238,52855	38972,27656	37579,88031	34853,75077	39340,81628	45879,37795	49130,31708	39048,38187	44234,58232	47109,57748	29045,18193	24890,48497	35281,6608	55588,6712
Cpd140: 2,4,6-Trihydroxypyridine	486232,4843	1040904,935	754513,8218	742001,9387	151542,1234	694374,01	1024940,7	1201938,415	591199,738	927770,0136	951511,5815	1271323,42	1633731,716	1373300,761
Cpd141: Unknown_081	28128,77718	49722,09373	21391,52748	34511,55979	36121,05058	21538,73565	65813,49745	29541,57231	19683,72894	23849,97768	35971,85568	30105,38788	31562,59957	16153,05564
Cpd142: 2-Deoxypentitol	527602,6632	510699,8391	470070,2479	419754,3454	398942,6609	427600,4782	556448,0158	479136,0055	400731,9729	522607,806	540339,7165	310684,4961	492270,3164	539346,327
Cpd143: 1,5-Anhydroglucitol	109387,9493	112936,3686	106595,7722	88705,02534	103032,379	108309,1333	135781,4762	129520,0135	94711,59285	129574,1763	137491,7167	90639,45953	113382,8084	130338,1297
Cpd144: L-Asparagine	252545,2217	865757,403	511258,6845	654088,7726	11495,82695	179413,8843	916610,8953	232721,3957	100494,728	134065,2109	230196,2778	2409850,661	418791,1762	370593,4669
Cpd145: Unknown_080	328955,4834	295159,1534	343306,2608	277839,1591	359816,8452	383809,3271	378813,3384	396434,1709	401337,9217	388092,0128	323809,9965	264747,1713	352761,7556	411308,4908
Cpd146: Unknown_079	145315,6639	215431,1253	100853,8263	168448,2595	122596,2273	131539,5136	228367,2359	158512,1935	125717,9687	150513,7313	144380,0606	213919,2033	159162,3975	169577,2203
Cpd147: Unknown_078	767048,1666	1043178,924	951191,1578	711568,8639	907702,8462	934694,6224	1000589,021	1034877,702	927713,7442	1117741,945	1040210,947	790838,9454	929679,9024	928812,7797
Cpd148: 2,5-dihydroxypyrazine	863536,8462	1706240,582	913609,8629	1284228,846	40552,62411	706568,1442	2773634,056	992726,1783	839222,1817	2166244,874	2908959,525	7075000,274	2593132,965	1900518,003
Cpd149: D-(-)-Ribofuranose (isomer 1)	1323285,301	1661988,721	1618203,073	1241974,301	1501477,25	1595488,813	1681557,026	1499281,16	1720826,988	1854891,53	1631167,261	1198038,45	1392860,246	1658993,457
Cpd150: L-Glutamic acid	7444403,19	5355664,8	4060114,13	4792171,14	2660997,462	3826475,837	5167832,351	5817542,418	3163322,474	7081090,311	3755606,931	3577982,159	4490225,731	4636254,681
Cpd151: D-(-)-Ribofuranose (isomer 3)	22295731,57	18465230,64	16544382,59	17274578,3	24716918,28	24505548,23	26700303,05	25365618,39	23733261,17	24523174,7	16412868,38	18711438,36	17443464,74	28138362,42
Cpd152: D-Ribose	5658259,742	4331067,291	3881005,727	4352592,092	6658717,225	6737991,036	7176771,775	7053476,36	6409756,179	6455945,294	3920824,943	4681349,156	4173259,706	7827745,025
Cpd153: D-(-)-Ribofuranose (isomer 2)	17613293,11	12245852,71	10259565,5	12291516,64	18768767,78	19654232,57	19141437,03	20784738,08	17240553,39	20701649,47	12495383,22	14907632,1	11518951	22557465,13
Cpd154: Galactopyranose	261986,9759	309116,9099	336098,9951	231599,4181	307261,2509	346325,5883	339556,4135	365294,0209	338444,6666	429598,0567	364699,6875	278061,9161	305705,3448	332827,7551
Cpd155: Unknown_077	439905,606	668542,3627	388858,2336	438179,689	373573,6746	436717,5485	452714,1262	423809,1792	399024,8427	492245,9312	416886,1204	341675,7484	432007,1944	481937,2508
Cpd156: D-(-)-Ribofuranose	2158721,623	2582348,921	2634156,807	1719352,623	2358037,365	2500609,412	2815318,731	2654219,939	2532050,717	2980537,687	2878515,346	2178175,868	2136824,195	4237297,34
Cpd157: ?-D-Ribopyranose	1429177,052	1725917,196	1822007,147	1153687,479	1662163,083	1643728,216	1904901,67	1596765,944	1877367,882	1691585,428	1580110,407	1382350,815	1382793,493	2622523,615
Cpd158: Unknown_076	90282,06475	115169,7927	80604,05992	83551,36968	85508,86064	81477,39655	100701,9586	77120,50362	74790,78799	97104,7733	90307,90141	59927,66621	82044,85247	113918,8376
Cpd159: Arabinose	683666,7292	801967,7769	907770,8318	512184,865	832225,7827	824831,6651	1056282,127	869814,7893	971394,443	836474,3444	824831,0914	518353,0078	667262,5063	1427955,862
Cpd160: Unknown_075	20081,9669	31723,16147	24663,83517	21320,27565	27154,0909	25514,07824	34767,7508	23731,2024	31035,24898	26986,81885	22057,86226	21301,16892	24897,47084	27469,44436
Cpd161: Unknown_074	63185,4111	102442,2151	76198,48099	71607,55597	70503,02137	73617,79115	74770,85627	67645,11853	69821,02285	95143,00702	84243,74838	70036,10035	68035,08053	66134,385
Cpd162: Unknown_073 (Arabinose?)	1119445,972	1341955,954	1407033,489	944055,177	1269946,056	1314453,33	1561498,375	1350963,767	1425593,463	1381553,173	1364802,864	1152860,85	1162588,577	2080699,39
Cpd163: Unknown_072	90241,74708	140112,81	85407,95892	90371,48895	74132,24922	77978,42762	98521,03009	102782,743	58346,46339	115573,9565	105803,6765	92145,20757	97572,30894	129837,0533
Cpd164: Asparagine	13124104,86	19130496,08	11908817,27	11541230,31	978292,9561	10102975,06	16663515,98	11009973,54	7462662,197	10793608,25	11399537,87	16761840,45	13399058,51	12943402,21
Cpd165: Unknown_071	175378,6448	217950,9812	186924,4949	144850,6377	8322,413334	110434,8454	261260,5176	116760,8372	93403,72489	149269,3759	180271,3816	392772,1548	201135,1791	140794,2767
Cpd166: Unknown_070	40838,76127	61735,42408	44194,66865	38980,58083	41357,96553	40419,88443	56493,97832	38755,89504	47579,41071	55636,58064	49408,2851	39619,34763	45425,41822	56256,74468
Cpd167: Unknown_069	90377,45801	64502,17539	98222,23733	74001,43081	112420,0243	105361,283	40945,92735	129600,8136	57493,01587	22620,08876	29744,38923	91004,91113	107154,0799	121545,1546
Cpd168: Unknown_068	6939,537387	15134,19265	7139,800917	10776,9654	1622,346004	7758,148278	17694,9526	11365,795	8968,861604	15058,63667	21187,68655	42022,34614	22746,15899	16957,52869
Cpd169: Unknown_067	1844990,271	2052890,098	1752903,721	1721328,598	2173546,155	2047232,585	2220899,918	2055127,326	1862706,316	2270518,482	2035843,471	1508928,172	2122896,215	2088643,982
Cpd170: Xylitol	205908,2534	202471,5253	232564,4519	170977,7818	218900,8653	197748,3069	247362,5203	279310,4616	193541,9458	235289,0489	255747,6738	199867,4586	273472,506	268075,9034
Cpd171: Unknown_066	42789,44418	57841,05461	43678,60973	41199,68101	45913,67919	40991,45326	41978,45333	44126,01962	39612,3893	60717,22865	36459,02072	26811,33032	43709,81002	49807,31965
Cpd172: Unknown_065	15562,77338	30279,65017	43666,66377	17423,7225	43459,50246	29945,54582	33125,96099	37835,52828	39520,88372	47187,72632	41454,24327	9550,869657	44441,31656	34721,19452
Cpd173: Arabitinol	4409310,316	3816643,671	3964945,358	3064151,408	5214325,767	5821823,394	6742244,961	3790378,239	5814697,353	4890661,423	4446680,756	3141356,77	4568911,609	3673730,977
Cpd174: Unknown_064	38694,51795	57811,56635	69831,09223	46748,11645	44338,55911	49772,79414	57953,72962	70315,68396	65566,68838	89895,76427	76300,58386	89551,94804	88227,58933	67894,75464
Cpd175: Unknown_063	124243,8106	167723,7061	128476,9771	125812,5041	131135,4205	110930,6232	107872,9921	130856,6439	110334,0211	200639,1415	184117,7183	101139,9462	147404,3778	151431,7298
Cpd176: D-Xylose	29287859,26	28828648,58	25106616,73	24030394,61	32120092,78	31522113,87	34064307,31	32765437,58	30740940	33964631,39	25873631,12	24799711,29	26922968,3	36377632,04
Cpd177: Arabitol	1784295,292	1765172,862	1485438,757	1596360,113	1348393,334	1853283,688	2184724,62	1447092,316	1776201,749	2080508,798	1547035,536	1238720,423	1722958,094	1563580,773
Cpd178: Adonitol	3625558,762	3706645,213	3523172,016	3110563,183	3672639,262	3878642,185	4243835,196	3984991,291	3936985,9	4090670,802	3756824,583	2990454,338	3818781,209	3849551,205
Cpd179: Unknown_062	460531,8538	309804,6217	479338,4184	312480,0943	441475,1023	406206,2941	450970,352	498814,5823	531837,3239	605213,3117	533036,5287	372651,4102	444955,0818	535881,5632
Cpd180: Unknown_061	272385,177	353519,734	241759,128	263723,1561	298111,833	265077,9719	341035,0786	305749,8482	264383,8959	331861,9121	276947,5114	244941,3052	318745,631	337648,653
Cpd181: Unknown_060	104750,9653	142076,7166	85896,75715	79056,45266	80954,33494	76898,20433	61621,63486	60771,39449	55177,15043	66586,89051	52369,01641	40894,97572	45120,98931	55576,03959
Cpd182: Unknown_059	18907,58169	24199,60558	14461,38801	13575,72475	15584,80605	17467,15379	14671,22175	12972,8179	15118,28117	14292,45769	9783,519019	10225,94604	10458,39096	11868,56174
Cpd183: Unknown_058	13674,77321	21608,2757	48346,48967	22005,15952	3886,352555	24220,38888	45849,92729	31448,57967	28170,93303	57527,90129	51463,76436	45132,82045	41965,65309	52529,51302
Cpd184: Unknown_057	86026,49642	106390,1956	70409,19688	71147,77185	71142,41393	68905,26689	98222,15251	148713,1467	50213,09404	77777,44198	107811,2409	67331,03982	116988,3107	100769,0216
Cpd185: Unknown_056	97344,98604	143564,4711	111835,6552	100189,1533	96081,1912	112305,8269	132727,5705	104009,1111	116967,4151	131813,0424	125789,1997	109672,9868	104313,0169	101010,8593
Cpd186: L-Rhamnose (isomer)	590124,5192	603784,6479	614926,0408	518060,2673	583774,2875	680127,3437	656222,8504	707221,6813	609990,0316	697681,645	613440,8552	632419,7809	602272,4524	714242,0071
Cpd187: Unknown_055	50149,76339	63401,84667	52775,00489	45338,03322	51227,4016	56553,57802	56633,82393	50093,52171	60019,73369	69005,46204	70152,42637	59184,77424	48443,53322	60925,05738
Cpd188: Unknown_054	189410,7423	144120,3956	116893,4858	102449,829	115065,6609	213224,1543	44287,03708	152420,7489	87199,26782	293427,43	105699,7852	123585,1756	112383,6501	179032,4429
Cpd189: Unknown_053	83378,13422	117594,0147	115056,6257	128933,3011	94469,5985	105080,5268	120698,1348	122064,0965	110986,4206	188547,8498	152385,1329	130371,0047	162030,4181	164909,5726
Cpd190: Unknown_052	841731,9312	1114928,457	741010,5677	827652,9447	860188,3593	805063,6241	1056281,581	962126,9995	760723,8556	979612,7165	819935,0458	741885,3933	912301,7672	1028262,326
Cpd191: Unknown_051	1993679,75	2335846,082	2151838,313	1995149,005	2104200,07	2209152,584	3204884,185	2521404,861	3003137,814	2619809,442	2464564,592	2084915,024	3501176,07	2765588,695
Cpd192: Arabinose	28043525,14	28205163,28	24343130,96	23352125,64	30457996,22	31129495,76	33290221,34	31220726,61	29798441,72	34149760,87	24979480,57	25182123,93	25003401,22	34769053,72
Cpd193: Unknown_050	704545,7723	836710,4806	719884,6215	599687,8245	735372,7143	668707,7072	799918,8392	676260,0345	758349,7226	859793,5029	744749,019	497172,0973	614720,0639	699669,0429
Cpd194: Unknown_049	80924,3761	167681,0438	202390,8669	129357,2705	157403,4349	102272,8772	42093,06282	130669,3391	79120,58218	46473,15717	67010,87546	135311,7016	202745,1867	105619,8496
Cpd195: Unknown_048	131626,6593	119535,462	197581,5538	153516,4978	31603,4107	120134,4501	174271,9709	165547,6092	107539,0426	92123,84206	393560,6039	130738,1546	148680,3048	283138,8201
Cpd196: D-Glucuronic acid	183764,7188	280697,4015	306410,7097	267384,8892	322701,5399	288382,4404	452035,095	665967,6655	469945,5189	572431,0528	447469,282	701673,5463	680654,5403	268362,4092
Cpd197: Unknown_047	6648,446365	10035,34596	14160,27877	9922,632503	1782,269152	9091,364539	20519,02382	11815,29756	10820,37528	20031,20178	19403,65751	20678,83678	19261,78949	20859,52072
Cpd198: Unknown_046	2135233,353	2507722,348	1922759,495	1750270,674	1937157,902	1929108,564	2090154,611	1946784,67	1943858,197	2588884,568	2247793,838	1461210,931	1862047,459	2133410,224
Cpd199: Terephthalic acid	167574,0507	186450,2282	164257,5931	114401,0475	132441,2591	113325,8483	140866,819	129738,2526	122638,8796	132837,4655	139435,9546	103437,5677	135371,7719	137767,5475
Cpd200: Citric acid	924563,8934	1215046,643	1552489,207	1013274,773	1080852,963	976557,9064	1792467,502	1405777,459	1186771,046	1255165,547	1696473,322	1187156,247	1565577,155	1863134,886
Cpd201: Unknown_044	2559737,337	2863728,064	2400834,841	2613744,648	2674720	2941987,903	2812819,948	2889734,392	2599091,925	3766811,149	2932582,874	3305731,817	3148658,054	3320272,772
Cpd202: Unknown_043	2624709,016	2863728,064	2401583,035	2613744,648	2651884,328	2941807,917	2812819,948	2889645,143	2599091,925	3765233,029	2932611,11	3305731,817	3123110,712	3342108,744
Cpd203: Unknown_042 (sugar)	3327639,108	3876703,821	3209477,616	2669758,656	3250807,564	3337731,652	3521901,7	3277832,127	3331808,087	3670571,038	3309785,532	2685119,993	3273159,748	3682847,722
Cpd204: D-Mannose	27443073,16	31680000,27	28011424,6	25761194,18	26843197,93	29758970,3	30255081,65	28685832,43	26930009,06	35869223,84	27413314,1	29933348,84	29779254,73	32292142,3
Cpd205: D-Mannose (isomer)	4975002,698	7204726,687	6951924,595	4744956,913	6993436,542	6588781,999	7302523,232	6263497,162	8275187,895	6809968,171	6386074,96	4905611,58	4987489,62	7112191,352
Cpd206: Unknown_041	6602388,531	7759461,478	7623772,308	7120006,62	6337701,26	6597546,653	8011729,489	7580113,135	7100797,156	12219225,6	9973789,072	7634302,567	8281713,094	8995341,855
Cpd207: Unknown_040	57508467,95	67502199,88	65593902,91	52234054,15	59446654,46	59039886,95	67301376,7	62180800,34	63999515,32	76488039,82	65877384,23	51830503,11	61883101,68	69346029,84
Cpd208: D-Mannitol (isomer 1)	1368154,352	984020,034	885403,764	1318991,717	1313793,328	1308584,638	1405550,702	1339269,39	834193,8456	1580277,017	932015,0427	1482027,65	1223242,437	1150285,342
Cpd209: D-Mannitol	17787676,92	19048237,29	16830343,38	14820959,16	19969795,34	19406422,82	22381794,03	18890803,81	20615571,7	19182806,53	17556414,71	14036749,99	18688902,94	18543611,91
Cpd210: Unknown_039	195901,8605	284942,2798	178844,168	191250,3528	148796,3695	140951,4619	176159,8576	184734,987	102776,0039	247860,3214	198182,185	120363,3631	158102,1908	210011,853
Cpd211: Unknown_038	82976,07573	119800,475	135726,8079	91393,08008	90848,6132	86985,04684	102313,914	93067,56357	103457,9827	155736,4312	123928,6125	81680,06347	99717,02998	112056,3307
Cpd212: Ascorbic acid	755342,525	1220078,855	2304037,55	1367844,214	2741006,836	636964,9624	1536910,344	1844038,948	758676,8836	1311095,87	1306327,407	861042,4953	2238755,829	518673,6758
Cpd213: D-(+)-Galacturonic acid	0	0	1541320,438	0	0	1064202,532	0	0	576824,7745	0	2081907,685	0	0	1509770,604
Cpd214: Unknown_037	246022,9417	319985,1817	180863,5791	226628,8815	203276,1508	199799,5494	253331,8686	227802,1489	177289,554	246148,2459	198274,2629	185417,752	220764,5034	254497,4948
Cpd215: D-Allofuranose	1157765,065	1243371,233	830580,9334	1036983,138	507060,3025	373544,4831	500910,6988	652488,7766	171844,3909	742830,5189	714648,8056	429833,9633	456015,2127	467759,3928
Cpd216: Unknown_036	838628,571	1010083,03	880144,3712	774526,0549	762110,7466	741562,4228	786626,2394	736547,4956	766818,5214	976359,7011	809345,8516	591640,1644	669054,9644	766219,1033
Cpd217: D-Glucose	71525618,32	83033481,27	67481241,54	62739484,52	66789055,64	73427441,95	73698602,43	70234904,09	65805294,62	84180680,06	65473198,4	66424875,62	67932732,53	75418833,13
Cpd218: Unknown_035	28287,54062	34782,90138	44786,21852	32374,68036	27974,2562	28072,34205	33953,11674	34052,62109	37412,82447	57465,84296	45030,06173	26506,19237	33404,08534	35178,56951
Cpd219: Unknown_034	760585,3578	953647,778	1040541,434	910979,1872	681725,5641	777362,6573	894043,6002	851545,1865	878290,8435	1562962,316	1269307,087	899416,6698	906643,4921	935322,2798
Cpd220: Unknown_033	194854,2619	657777,5468	998317,9867	222148,491	200962,1607	149973,5508	157783,3278	187945,0437	112267,4452	327444,8425	424384,1814	175747,2441	242818,7562	269490,3844
Cpd221: Unknown_032	300319,5701	451353,7668	518858,9138	367786,6423	378146,0406	439621,9058	538876,0381	425744,8941	624291,5033	617557,6641	460197,1364	376689,8593	415969,497	379617,2283
Cpd222: Galacturonic acid	0	0	2657601,43	0	0	1983429,409	0	0	889382,0743	0	4103342,06	0	0	2731063,091
Cpd223: Unknown_031	135635,8363	431378,6818	517929,7207	118006,9258	140417,3115	121221,1454	110806,8689	122198,9776	92217,97406	151950,8553	183253,9103	94617,67347	127983,2494	158552,4231
Cpd224: Unknown_030	21328,70902	42818,12049	88109,13202	79104,52645	80141,91709	82329,00603	131888,8916	260285,9584	203827,5309	343095,7662	303483,0553	505974,792	469962,4058	136068,6272
Cpd225: Unknown_029	135222,6872	461666,2016	607486,1986	141568,0465	147697,367	120058,5753	116114,5939	131127,5204	92970,27271	204330,2856	267469,7552	124396,5255	155500,2742	172607,5494
Cpd226: Unknown_028	1729718,305	2737913,517	2854616,853	2003797,933	2200149,178	2348664,492	2557555,634	2123785,734	2721897,865	3154972,413	2461348,015	2026708,706	2092161,464	2242346,844
Cpd227: Galactaric acid	13219,15849	12225,56131	135357,7559	10297,94665	15312,35877	275582,4233	11956,65707	9714,395352	109102,183	14372,77559	179253,909	7969,935331	8312,046133	240696,125
Cpd228: Unknown_027	18234,56764	19243,41959	20718,41527	14065,07766	9704,870653	14184,83534	18351,72795	15887,84721	13610,93918	18236,94025	21586,58891	12759,62242	12408,18069	18018,16081
Cpd229: Unknown_026	18145,40964	31579,6157	17740,03043	22992,37398	22907,37855	22148,0757	28848,31023	22584,60001	15374,90955	26206,46121	19361,02294	17356,60255	22802,60092	23753,00198
Cpd230: Palmitic Acid	968735,6096	1440763,776	883379,2742	1513049,828	1390339,008	1530176,616	2017878,144	1469717,731	1345734,297	1551227,075	1234060,853	1487508,303	1439428,963	1903324,236
Cpd231: Unknown_025	71812,18235	80899,48814	60110,67013	49770,37228	55781,00831	55402,40171	61347,49067	64210,44059	47958,61146	55207,43278	62860,19586	42923,02213	58317,65892	62875,95566
Cpd232: L-Rhamnose	986833,7298	1180803,353	838875,4939	640744,6573	719713,0771	721379,6318	847136,2526	854046,5101	607178,7615	750060,5798	856412,4037	585128,8402	818278,7616	915769,3142
Cpd233: Myo-Inositol	7406419,604	8948092,559	8118496,119	7200797,191	8437320,481	7911062,577	9097643,615	9245332,063	6910477,96	9017561,971	7677210,995	6466707,208	7658787,804	8682089,186
Cpd234: Unknown_024	19149,65279	30389,15986	33708,44328	18735,78591	27745,16874	27280,41208	19002,70548	21410,25815	28600,32664	29662,79833	21186,3294	13723,86799	20904,58345	26830,88047
Cpd235: Unknown_023	9612,275932	11707,88019	14663,89243	11321,12074	11240,74297	11717,60094	15452,67385	14994,72476	14682,28172	22447,58029	17174,40285	15483,99289	16621,91196	12771,40813
Cpd236: Unknown_022	9111,325119	12482,41485	9681,426265	8848,844253	9045,222767	8990,601326	9487,171393	10028,61967	7550,60674	10966,31052	11003,34946	8650,25459	8032,039225	8728,24714
Cpd237: Unknown_021	7419,448125	14182,76912	10982,67093	10773,46346	6594,557618	10078,67967	10218,76854	8674,030288	12497,98571	15221,81124	8959,511105	11894,89634	10141,61242	7307,330837
Cpd238: Unknown_020	77447,80247	116921,4117	65173,60783	105742,965	67305,01897	78008,27075	67189,47121	82759,88903	55361,94042	87045,27502	55888,36973	79242,99748	73944,8178	66340,83594
Cpd239: Linoleic acid	35283,51552	74358,44596	62084,99789	83201,73117	100617,6679	112264,2301	128356,3226	120756,5324	121875,3234	138328,6665	110883,9906	107755,9087	123837,3059	150798,7271
Cpd240: Oleic acid	62387,13752	91284,78938	61142,02526	95436,73738	97665,07715	113208,7685	123128,7811	101833,7777	104156,697	113045,1349	76540,12541	87375,69379	103228,897	143837,6715
Cpd241: Unknown_019 (Sugar?)	16015,27209	90359,61211	106677,6871	35429,10532	22454,77985	13741,75847	11685,0248	22591,65039	14437,19711	35987,70622	39503,22963	13415,35264	27868,51349	21273,48375
Cpd242: Galactinol	268292,9398	318648,2167	303220,6583	252043,0945	249679,8381	337545,55	297293,3034	282888,7451	313828,2207	367672,8574	257001,4367	207621,5378	229459,1878	264907,2675
Cpd243: Stearic acid	306687,0977	338608,0494	236753,3712	419244,4791	312274,8357	350388,4903	490086,4861	433125,7631	337692,4547	356019,5723	263647,3514	404422,4015	331482,5087	388214,8772
Cpd244: Unknown_018 (Sugar?)	4369,89832	11511,88265	13339,35035	4625,581579	4316,727566	3693,383294	3358,075214	4385,115023	2657,050893	7399,859084	8186,239277	3458,925607	6174,782462	4764,952852
Cpd245: Unknown_017 (Sugar?)	6232,151251	7277,401124	6416,192322	4926,64303	4945,265655	6703,776807	5902,918336	5815,761616	5358,969737	7623,209122	5088,241047	4395,292638	5014,011443	5039,359902
Cpd246: Unknown_016	49128,7031	55316,36338	43481,27115	49217,65475	37854,30991	41505,5773	35787,95453	38783,47034	29037,12827	60128,66771	50567,35145	40212,59963	37462,03728	42512,81672
Cpd247: Unknown_015	5435,576025	21535,81949	27122,6729	24435,81354	27631,54705	23102,24038	32164,48229	62341,84696	34267,58418	48485,74778	36143,3638	68123,54044	54875,11928	15634,5767
Cpd248: Unknown_014	2447,905025	3056,90697	2095,310197	1482,52492	2688,593347	2279,872032	2448,009608	2637,86989	1934,983297	2656,84432	1370,937786	1562,725627	1820,291996	2433,162471
Cpd249: Unknown_013	5134,472642	11556,72016	7408,967827	10362,49384	11922,29194	10747,79124	11950,85896	9573,330045	10504,90576	13195,05301	9704,65403	9523,087179	10090,16917	11553,98236
Cpd250: Unknown_012	1644,188969	4019,355159	3060,038675	2689,167036	3059,348781	2403,086334	4316,561133	3080,376397	3661,179095	1942,24826	2865,681028	3411,822944	3155,917149	2522,604603
Cpd251: Unknown_011	4046,242076	7857,351354	6383,621128	5574,827378	6228,326184	5894,679535	8181,335869	6696,728204	6175,58497	5790,858717	6316,400307	6211,383296	6542,391901	5508,179751
Cpd252: D-Galacturonic acid	7813,376786	9318,624192	8959,322086	6091,796862	7925,246205	9101,432843	7654,103748	7806,645357	5865,742056	7473,847778	8036,956455	7755,173683	6889,714933	7223,273216
Cpd253: Unknown_010	5783,372864	11257,38609	9380,804684	7333,3761	6728,382113	5353,259394	11751,02708	6835,046455	7312,59152	6357,929512	9140,534467	7310,521726	8370,426497	5552,687056
Cpd254: Unknown_009	4006,185107	8782,339371	8827,897932	4973,921123	3408,084166	5067,607547	3027,415014	6325,288411	5997,866777	6426,338402	8627,164701	4629,460987	4054,216778	6357,066941
Cpd255: Myo-inositol (minor isomer)	7368,21979	19055,30989	16186,16216	13897,39531	14654,87441	16886,28678	18149,44049	16432,29909	16841,89754	17487,91151	15452,32875	16635,91706	17264,21765	15175,23162
Cpd256: Unknown_008	97717,16101	113830,446	130300,8424	85816,1802	142091,6575	97398,30469	174356,6999	159059,4852	85951,2824	76567,62272	95630,14499	33778,02019	115970,8439	140730,3837
Cpd257: Unknown_007	3346,760241	10795,85632	6625,1414	9299,650045	47,60706337	2907,853679	15252,69716	9596,716657	3001,310856	16186,24224	46980,03395	120185,5444	38648,5612	21071,33012
Cpd258: Unknown_006	5521,908639	10437,96981	6028,60714	7135,741457	7209,338995	6936,542352	7493,482253	8070,477416	5461,429798	8864,47768	8643,393492	7274,885052	6655,921007	8450,52204
Cpd259: D-Ribofuranose	41885,75715	101292,1886	78448,86817	63889,05402	65266,52517	43398,47756	124782,5357	61331,22363	71023,34996	55038,05978	63747,65086	89565,41344	67293,89968	50379,34205
Cpd260: Unknown_005 (likely a sugar)	2714,735834	5612,449827	3706,395017	3675,994542	5006,935681	2828,580091	7847,375756	4063,901446	4377,460055	3598,385489	4119,181421	4520,328648	3520,804467	3378,120002
Cpd261: L-Sorbofuranose	51676,34217	155220,206	103717,6029	90584,44069	83391,08452	62200,46497	204281,8673	80286,06855	111783,5077	88869,16413	96888,74061	114617,8576	96290,43732	59894,34534
Cpd262: Unknown_004 (likely a sugar)	9939,743907	12685,99241	16664,47985	12468,70888	17596,74771	11217,5128	20855,39392	19447,79158	11429,9209	15821,30729	15829,04307	6635,089082	17998,42933	18804,4237
Cpd263: L-Sorbofuranose (minor isomer)	28570,7792	42170,24135	20335,83766	26230,39738	26270,65092	17295,11071	70130,95359	17082,66464	16456,25297	20547,70272	19574,21529	46888,42031	16556,52871	20757,30536
Cpd264: Sucrose (minor isomer 5)	19916,71737	12176,22071	23127,4771	8642,464245	23307,43216	13739,91578	29147,76576	18997,35776	14510,41703	9393,343053	13857,8686	2772,970945	21640,38355	24086,45135
Cpd265: Sucrose (minor isomer 4)	78550,86748	100965,6908	120550,4066	95822,53917	132294,5676	106841,5929	144764,4894	139594,1091	69979,5391	114155,3765	125200,6307	38323,95787	154098,1384	164498,6152
Cpd266: Unknown_003 (likely a sugar)	12616,15762	14870,22074	8020,90624	13050,2666	18432,06611	19581,36619	21503,64812	11909,92084	9906,317509	24351,61748	29136,32581	7590,144792	16734,0549	30690,44101
Cpd267: Lactose (minor isomer)	31025,42913	39761,36791	42253,03887	33210,35625	55902,53539	35586,18204	72888,38001	48671,4479	36021,0678	35074,89062	43477,7963	18451,52679	40636,88653	57640,2545
Cpd268: Sucrose (minor isomer 3)	121531,1497	165316,4682	152563,4034	144449,0273	202025,3606	107106,7423	143838,5805	173156,9492	99646,97182	119866,9045	137930,6762	40980,56718	173337,7643	202023,7338
Cpd269: Unknown_002 (likely a sugar)	9474,302178	7226,460447	15150,25577	10004,1278	11473,01256	14664,52977	26076,35803	12312,54109	9089,888227	7216,10319	11022,32742	3417,110547	10390,68927	19214,1096
Cpd270: Unknown_001 (likely a sugar)	12280,0526	22546,98553	12999,74724	16701,96918	13401,43944	15217,42757	14077,78723	12205,50148	12323,88056	23355,79159	13987,18529	24687,7248	15423,0371	17256,7922
Cpd271: Sucrose (minor isomer 2)	19754,19893	36197,28938	55000,48785	40162,23083	52244,48194	27322,72249	80246,16117	64003,16501	43620,89445	48019,36835	44341,33829	13277,2332	54665,16242	54571,40402
Cpd272: D-Fructofuranose	254308,2422	625278,9839	195737,5224	318861,8162	179379,6267	328117,4015	198838,6189	168359,3969	258229,4343	460580,75	256128,6984	406092,7963	202935,6939	242663,9421
Cpd273: D-Psicofuranose	10597,70791	36853,00195	9799,937084	20984,96171	34296,78636	24805,75349	24984,97378	8925,665446	17043,00389	21830,53062	14405,41771	27354,5145	16780,14769	17220,47107
Cpd274: Sucrose	43291235,12	52534251,69	47308600,53	40968083,04	52271916,58	46982465,62	58399996,65	53106141,77	44451828,53	53029122,4	49032149,63	33611878,66	52157706,85	60290405,62
Cpd275: 3?-Mannobiose	20470,71459	44497,50346	22004,52144	36866,84485	16800,2562	38591,43071	35168,99347	31211,66491	35877,62409	58601,96111	25107,69016	66112,60046	36761,42103	45210,59909
Cpd276: 3?-Mannobiose (isomer)	29961,36311	59597,32386	29528,42219	40352,57805	38990,28979	50911,85256	37138,44214	36964,61488	49346,4425	77272,24256	49238,80566	96251,40178	79056,58989	74771,01383
Cpd277: Catechin	30983,14311	87074,63375	59341,45238	43284,61022	48869,16718	40965,51043	53738,52613	52161,74247	56470,28061	69753,55034	76173,05383	170212,835	63060,48831	49695,18179
Cpd278: Cellobiose	2376,629181	13027,24403	15593,59285	12169,47167	4404,310224	0	6174,20986	11504,59442	0	22633,63899	33746,59036	46996,49143	27717,90783	14392,082
Cpd279: Nonacosan-10-ol	19153,45642	24413,35355	20535,46409	24947,48604	29044,57596	21767,14344	43233,1963	29140,10424	24981,40283	39562,12339	31451,16723	37901,58758	46864,40615	46536,32241
Cpd280: ?-Sitosterol	40784,01215	58178,27803	36865,4316	53196,43482	56136,11184	64563,47965	56040,30784	70876,897	56871,07254	85238,67765	69411,67046	105159,8333	99078,36087	84782,79452
Cpd281: Sucrose (minor isomer)	383325,6495	280710,0844	1065565,836	287545,2847	964039,8949	1209743,305	1078425,471	950487,0835	1483405,156	793649,8731	1291693,29	280972,148	1022037,343	1484574,38
Cpd282: Erythrodiol	494,6773646	374,3750739	670,2671819	366,2730045	1172,408485	826,3151115	834,3356058	1369,825292	1553,059312	1079,242932	1186,854942	655,9444668	970,2933772	1107,897034
Cpd283: Uvaol	6824,067873	8218,26684	9545,193591	6191,743362	15497,25038	10964,1477	7728,673009	13383,40553	14522,15944	12904,75793	15194,15554	10168,64064	13168,63648	15038,81812
Cpd284: Oleanolic acid	163713,8148	132505,0829	179624,0006	180865,7278	442798,0268	375639,6012	331769,8555	426471,647	536009,3516	526140,1528	472263,755	410671,9884	524142,6672	406626,3701
Cpd285: Ursolic acid	1312939,198	960658,9526	1555156,337	1375005,075	3238742,627	2724894,582	2241799,125	2842472,037	3032751,911	4025903,153	3711078,602	2263978,895	3478207,374	3254389,787
